# Supplementary material for: Outcomes of a Statewide Learning Collaborative to Implement Mental Health Services in Pediatric Primary Care
Source: Atypon-hosted journal article supplement (doi:10.1176/appi.ps.201800163), 2018-12-10
Supplement: appi.ps.201800163.ds001.pdf [file appi.ps.201800163.ds001.pdf]

**Appendix A: BMW Star Recognition Program**

Data Supplement for Baum et al. (10.1176/appi.ps.201800163)

Practice sites will be recognized throughout the course of the Learning Network and earn stars for implementing systems to support five BMW key areas. A star will be earned when practices can demonstrate completion of all the interventions listed under a BMW key area. Practices may earn up to 5 stars. Recognition will be provided on the BMW online community and promotional materials will be provided for display in the office and on the practice website. As practices progress, new posters that reflect their advancement will be provided.

- Step 1:** Practices will be evaluated at each of the scheduled site visits.
- Step 2:** On the monthly progress report, practices will be able to share their progress towards this recognition program. When you are able to check all aspects of a BMW key area, you will receive that color star.

|  <p><b>Resources</b><br/>Providing Mental Health Resources for our patients and the public.</p>                                                                                                                                                           |  <p><b>Tracking</b><br/>Ensuring our patients schedule and keep their mental wellness appointments</p>                                                                                                                 |  <p><b>Mental Health Promotion &amp; Screening</b><br/>Ensuring we are screening for and providing guidance about mental wellness for our patients.</p>                                                                                                                                                                                                                                                          |  <p><b>Integration Planning &amp; Implementation</b><br/>Working to build bridges to promote mental wellness in our community.</p>                                                                                                                                                             |  <p><b>Practice Based Interventions</b><br/>Ensuring our staff is trained appropriately in helping our patients during times of mental wellness needs.</p>                                                                                                            |
|--------------------------------------------------------------------------------------------------------------------------------------------------------------------------------------------------------------------------------------------------------------------------------------------------------------------------------------------|---------------------------------------------------------------------------------------------------------------------------------------------------------------------------------------------------------------------------------------------------------------------------------------------------------|----------------------------------------------------------------------------------------------------------------------------------------------------------------------------------------------------------------------------------------------------------------------------------------------------------------------------------------------------------------------------------------------------------------------------------------------------------------------------------------------------|-----------------------------------------------------------------------------------------------------------------------------------------------------------------------------------------------------------------------------------------------------------------------------------------------------------------------------------------------------------------------------------|----------------------------------------------------------------------------------------------------------------------------------------------------------------------------------------------------------------------------------------------------------------------------------------------------------------------------------------------------------|
| <ul style="list-style-type: none"> <li><input type="checkbox"/> Local mental health resource directory (updated in last year)</li> <li><input type="checkbox"/> Mental health promotional materials displayed in office</li> <li><input type="checkbox"/> Mental health education materials available for patients and families</li> </ul> | <ul style="list-style-type: none"> <li><input type="checkbox"/> Mental health appointment reminder system</li> <li><input type="checkbox"/> Mental health recall system for missed appointments</li> <li><input type="checkbox"/> Log to keep track of patients with a mental health concern</li> </ul> | <p>System is in place for:</p> <ul style="list-style-type: none"> <li><input type="checkbox"/> providing anticipatory guidance for healthy social-emotional development in early childhood</li> <li><input type="checkbox"/> postpartum depression screening</li> <li><input type="checkbox"/> screening development in early childhood</li> <li><input type="checkbox"/> autism screening</li> <li><input type="checkbox"/> social-emotional screening, school age through adolescence</li> </ul> | <ul style="list-style-type: none"> <li><input type="checkbox"/> Develop a system of ongoing communication with referred mental health providers regarding patient and family mental-health-care plan</li> <li><input type="checkbox"/> Community reception is hosted</li> <li><input type="checkbox"/> Advanced one or more levels on SAMHSA models of integrated care</li> </ul> | <ul style="list-style-type: none"> <li><input type="checkbox"/> Staff and clinicians complete Common Factors training</li> <li><input type="checkbox"/> Clinicians complete Psychopharmacology Online Learning Module</li> <li><input type="checkbox"/> A crisis plan in place for handling of psychiatric emergencies, including suicidality</li> </ul> |

**Appendix B: Diagnoses Included in Claims Analysis by Class of Mental Health Condition**

| Class                 | ICD-9 Code | Descriptor                                                                                            |
|-----------------------|------------|-------------------------------------------------------------------------------------------------------|
| Anxiety or depression | 292.84     | Drug-Induced Mood Disorder                                                                            |
|                       | 293.83     | Mood disorder in conditions classified elsewhere                                                      |
|                       | 293.84     | Anxiety disorder in conditions classified elsewhere                                                   |
|                       | 296.20     | Major depressive affective disorder, single episode, unspecified                                      |
|                       | 296.21     | Major depressive affective disorder, single episode, mild                                             |
|                       | 296.22     | Major depressive affective disorder, single episode, moderate                                         |
|                       | 296.23     | Major depressive affective disorder, single episode, severe, without mention of psychotic behavior    |
|                       | 296.24     | Major depressive affective disorder, single episode, severe, specified as with psychotic behavior     |
|                       | 296.25     | Major depressive affective disorder, single episode, in partial or unspecified remission              |
|                       | 296.26     | Major depressive affective disorder, single episode, in full remission                                |
|                       | 296.30     | Major depressive affective disorder, recurrent episode, unspecified                                   |
|                       | 296.31     | Major depressive affective disorder, recurrent episode, mild                                          |
|                       | 296.32     | Major depressive affective disorder, recurrent episode, moderate                                      |
|                       | 296.33     | Major depressive affective disorder, recurrent episode, severe, without mention of psychotic behavior |
|                       | 296.34     | Major depressive affective disorder, recurrent episode, severe, specified as with psychotic behavior  |
|                       | 296.35     | Major depressive affective disorder, recurrent episode, in partial or unspecified remission           |
|                       | 296.36     | Major depressive affective disorder, recurrent episode, in full remission                             |
|                       | 296.99     | Other and unspecified affective psychoses                                                             |
|                       | 300.00     | Anxiety state, unspecified                                                                            |
|                       | 300.01     | Panic disorder without agoraphobia                                                                    |
|                       | 300.02     | Generalized anxiety disorder                                                                          |
|                       | 300.09     | Other anxiety states                                                                                  |
|                       | 300.20     | Phobia, unspecified                                                                                   |
|                       | 300.21     | Agoraphobia with panic disorder                                                                       |
|                       | 300.22     | Agoraphobia without mention of panic attacks                                                          |
|                       | 300.23     | Social phobia                                                                                         |
|                       | 300.29     | Other isolated or specific phobias                                                                    |
|                       | 300.3      | Obsessive-compulsive disorders                                                                        |
|                       | 300.4      | Dysthymic disorder                                                                                    |
|                       | 300.80     | Somatoform disorders                                                                                  |
|                       | 300.81     | Somatization disorder                                                                                 |
|                       | 300.9      | Unspecified nonpsychotic mental disorder                                                              |
|                       | 301.12     | Chronic depressive personality disorder                                                               |
|                       | 308.0      | Predominant disturbance of emotions                                                                   |
|                       | 308.1      | Predominant disturbance of consciousness                                                              |
|                       | 308.2      | Predominant psychomotor disturbance                                                                   |
|                       | 308.3      | Other acute reactions to stress                                                                       |
|                       | 308.4      | Mixed disorders as reaction to stress                                                                 |

|                  |        |                                                                                                           |
|------------------|--------|-----------------------------------------------------------------------------------------------------------|
|                  | 308.9  | Unspecified acute reaction to stress                                                                      |
|                  | 309.0  | Adjustment disorder with a depressed mood                                                                 |
|                  | 309.1  | Prolonged depressive reaction                                                                             |
|                  | 309.21 | Separation anxiety disorder                                                                               |
|                  | 309.24 | Adjustment disorder with anxiety                                                                          |
|                  | 309.28 | Adjustment disorder with mixed anxiety and depressed mood                                                 |
|                  | 309.81 | Posttraumatic Stress Disorder                                                                             |
|                  | 309.9  | Unspecified adjustment reaction                                                                           |
|                  | 310.89 | Other specified nonpsychotic mental disorders following organic brain damage                              |
|                  | 310.9  | Unspecified nonpsychotic mental disorder following organic brain damage                                   |
|                  | 311    | Depressive disorder, not elsewhere classified                                                             |
|                  | 313.0  | Overanxious disorder specific to childhood and adolescence                                                |
|                  | 313.1  | Misery and unhappiness disorder specific to childhood and adolescence                                     |
|                  | 313.23 | Selective mutism                                                                                          |
|                  | 313.9  | Unspecified emotional disturbance of childhood or adolescence                                             |
|                  | 780.79 | Other malaise and fatigue                                                                                 |
|                  | 799.21 | Nervousness                                                                                               |
| Bipolar disorder | 296.00 | Bipolar I disorder, single manic episode, unspecified                                                     |
|                  | 296.01 | Bipolar I disorder, single manic episode, mild                                                            |
|                  | 296.02 | Bipolar I disorder, single manic episode, moderate                                                        |
|                  | 296.03 | Bipolar I disorder, single manic episode, severe, without mention of psychotic behavior                   |
|                  | 296.04 | Bipolar I disorder, single manic episode, severe, specified as with psychotic behavior                    |
|                  | 296.05 | Bipolar I disorder, single manic episode, in partial or unspecified remission                             |
|                  | 296.06 | Bipolar I disorder, single manic episode, in full remission                                               |
|                  | 296.1  | Manic disorder recurrent episode                                                                          |
|                  | 296.10 | Manic affective disorder, recurrent episode, unspecified                                                  |
|                  | 296.11 | Manic affective disorder, recurrent episode, mild                                                         |
|                  | 296.12 | Manic affective disorder, recurrent episode, moderate                                                     |
|                  | 296.13 | Manic affective disorder, recurrent episode, severe, without mention of psychotic behavior                |
|                  | 296.14 | Manic affective disorder, recurrent episode, severe, specified as with psychotic behavior                 |
|                  | 296.15 | Manic affective disorder, recurrent episode, in partial or unspecified remission                          |
|                  | 296.16 | Manic affective disorder, recurrent episode, in full remission                                            |
|                  | 296.40 | Bipolar I disorder, most recent episode (or current) manic, unspecified                                   |
|                  | 296.41 | Bipolar I disorder, most recent episode (or current) manic, mild                                          |
|                  | 296.42 | Bipolar I disorder, most recent episode (or current) manic, moderate                                      |
|                  | 296.43 | Bipolar I disorder, most recent episode (or current) manic, severe, without mention of psychotic behavior |
|                  | 296.44 | Bipolar I disorder, most recent episode (or current) manic, severe, specified as with psychotic behavior  |
|                  | 296.45 | Bipolar I disorder, most recent episode (or current) manic, in partial or unspecified remission           |
|                  | 296.46 | Bipolar I disorder, most recent episode (or current) manic, in full remission                             |
|                  | 296.5  | Bipolar I disorder, most recent episode (or current) depressed                                            |
|                  | 296.50 | Bipolar I disorder, most recent episode (or current) depressed, unspecified                               |
|                  | 296.51 | Bipolar I disorder, most recent episode (or current) depressed, mild                                      |

|                              |                                                                                                                                                                                                          |                                                                                                                                                                                                                                                                                                                                                                                                                                                                                                                                                                                                                                                                                                                                                                                                                                                                                                                                                                                                                                                                                                                                                                                                                                                                                                                                                                                                                                                                                  |
|------------------------------|----------------------------------------------------------------------------------------------------------------------------------------------------------------------------------------------------------|----------------------------------------------------------------------------------------------------------------------------------------------------------------------------------------------------------------------------------------------------------------------------------------------------------------------------------------------------------------------------------------------------------------------------------------------------------------------------------------------------------------------------------------------------------------------------------------------------------------------------------------------------------------------------------------------------------------------------------------------------------------------------------------------------------------------------------------------------------------------------------------------------------------------------------------------------------------------------------------------------------------------------------------------------------------------------------------------------------------------------------------------------------------------------------------------------------------------------------------------------------------------------------------------------------------------------------------------------------------------------------------------------------------------------------------------------------------------------------|
|                              | 296.52<br>296.53<br>296.54<br>296.55<br>296.56<br>296.6<br>296.60<br>296.61<br>296.62<br>296.63<br>296.64<br>296.65<br>296.66<br>296.7<br>296.8<br>296.80<br>296.81<br>296.89<br>296.90<br>298.0         | Bipolar I disorder, most recent episode (or current) depressed, moderate<br>Bipolar I disorder, most recent episode (or current) depressed, severe, without mention of psychotic behavior<br>Bipolar I disorder, most recent episode (or current) depressed, severe, specified as with psychotic behavior<br>Bipolar I disorder, most recent episode (or current) depressed, in partial or unspecified remission<br>Bipolar I disorder, most recent episode (or current) depressed, in full remission<br>Bipolar i disorder, most recent episode (or current) mixed<br>Bipolar I disorder, most recent episode (or current) mixed, unspecified<br>Bipolar I disorder, most recent episode (or current) mixed, mild<br>Bipolar I disorder, most recent episode (or current) mixed, moderate<br>Bipolar I disorder, most recent episode (or current) mixed, severe, without mention of psychotic behavior<br>Bipolar I disorder, most recent episode (or current) mixed, severe, specified as with psychotic behavior<br>Bipolar I disorder, most recent episode (or current) mixed, in partial or unspecified remission<br>Bipolar I disorder, most recent episode (or current) mixed, in full remission<br>Bipolar I disorder, most recent episode (or current) unspecified<br>Other and unspecified bipolar disorders<br>Bipolar disorder, unspecified<br>Atypical manic disorder<br>Other bipolar disorders<br>Unspecified episodic mood disorder<br>Depressive type psychosis |
| Disruptive behavior disorder | 301.3<br>309.3<br>309.4<br>312.00<br>312.01<br>312.02<br>312.03<br>312.1<br>312.10<br>312.11<br>312.12<br>312.13<br>312.2<br>312.20<br>312.21<br>312.22<br>312.23<br>312.30<br>312.34<br>312.4<br>312.81 | Explosive personality disorder<br>Adjustment disorder with disturbance of conduct<br>Adjustment Disorder with Mixed Disturbance of Emotions and Conduct<br>Undersocialized conduct disorder, aggressive type, unspecified<br>Undersocialized conduct disorder, aggressive type, mild<br>Undersocialized conduct disorder, aggressive type, moderate<br>Undersocialized conduct disorder, aggressive type, severe<br>Undersocialized conduct disorder unaggressive type<br>Undersocialized conduct disorder, unaggressive type, unspecified<br>Undersocialized conduct disorder, unaggressive type, mild<br>Undersocialized conduct disorder, unaggressive type, moderate<br>Undersocialized conduct disorder, unaggressive type, severe<br>Socialized conduct disorder<br>Socialized conduct disorder, unspecified<br>Socialized conduct disorder, mild<br>Socialized conduct disorder, moderate<br>Socialized conduct disorder, severe<br>Impulse control disorder<br>Intermittent explosive disorder<br>Mixed disturbance of conduct and emotions<br>Conduct disorder, childhood onset type                                                                                                                                                                                                                                                                                                                                                                                    |

|                                                  |                                                                                                         |                                                                                                                                                                                                                                                                                                                                                                                                                                                                                                                                                                                                                                    |
|--------------------------------------------------|---------------------------------------------------------------------------------------------------------|------------------------------------------------------------------------------------------------------------------------------------------------------------------------------------------------------------------------------------------------------------------------------------------------------------------------------------------------------------------------------------------------------------------------------------------------------------------------------------------------------------------------------------------------------------------------------------------------------------------------------------|
|                                                  | 312.82<br>312.89<br>312.9<br>313.81                                                                     | Conduct disorder, adolescent onset type<br>Other conduct disorder<br>Unspecified disturbance of conduct<br>Oppositional defiant disorder                                                                                                                                                                                                                                                                                                                                                                                                                                                                                           |
| Autism spectrum disorder                         | 299.00<br>299.01<br>299.1<br>299.10<br>299.11<br>299.8<br>299.80<br>299.81<br>299.9<br>299.90<br>299.91 | Autistic disorder, current or active state<br>Autistic disorder, residual state<br>Childhood disintegrative disorder<br>Childhood disintegrative disorder, current or active state<br>Childhood disintegrative disorder, residual state<br>Other specified pervasive developmental disorders<br>Other specified pervasive developmental disorders, current or active state<br>Other specified pervasive developmental disorders, residual state<br>Unspecified pervasive developmental disorder<br>Unspecified pervasive developmental disorder, current or active state<br>Unspecified pervasive developmental disorder, residual |
| Intellectual disability /<br>developmental delay | 315.5<br>315.8<br>315.9<br>317<br>318.0<br>318.1<br>318.2<br>319<br>783.42                              | Mixed development disorder<br>Other specified delays in development<br>Unspecified delay in development<br>Mild intellectual disabilities<br>Moderate intellectual disabilities<br>Severe intellectual disabilities<br>Profound intellectual disabilities<br>Unspecified intellectual disabilities<br>Delayed milestones                                                                                                                                                                                                                                                                                                           |
| ADHD                                             | 314.00<br>314.01<br>314.1<br>314.2<br>314.8<br>314.9                                                    | Attention deficit disorder without mention of hyperactivity<br>Attention deficit disorder with hyperactivity<br>Hyperkinesis with developmental delay<br>Hyperkinetic conduct disorder<br>Other specified manifestations of hyperkinetic syndrome<br>Unspecified hyperkinetic syndrome                                                                                                                                                                                                                                                                                                                                             |
